# Supplementary material for: Molecular Epidemiology of Norovirus (NoV) Infection in Mie Prefecture: The Kinetics of Norovirus Antigenemia in Pediatric Patients
Source: MDPI journal article supplement (doi:10.3390/v14020173), 2022-01-18
Supplement: s1 [file s1]

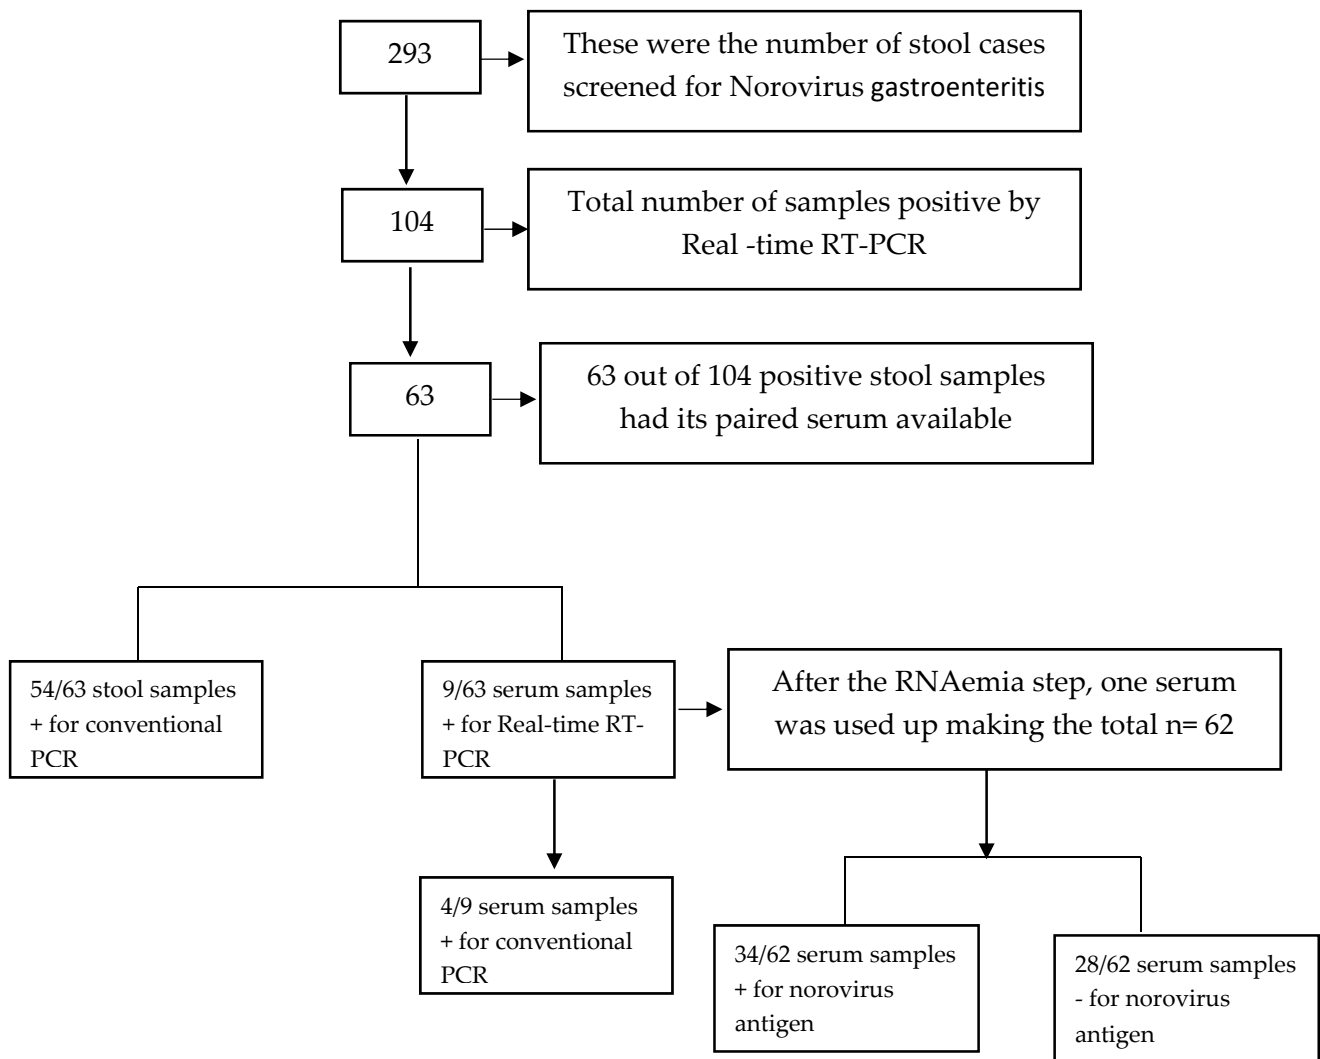

**Figure S1.** Summary of cases used in this study for statistical analyses

**Table S1.** Shows the distribution of Norovirus co-infection with other pathogens

| Variable                     | n (%)    |
|------------------------------|----------|
| Norovirus only               | 58(92.1) |
| Norovirus & Adenovirus       | 1(1.6)   |
| Norovirus & Bacterial agents | 4(6.3)   |

**Table S2.** Reagents used in the reverse transcription (RT) reaction

| RT mix                  | Volume (μl) |
|-------------------------|-------------|
| 5 X First strand Buffer | 3           |
| 10mM dNTPs              | 1           |
| Random Primer           | 0.5         |
| 100mM DTT               | 1           |
| Ribonuclease Inhibitor  | 0.67        |
| Super Script II RT      | 1           |
| DW                      | 2.83        |
| Extracted RNA           | 10          |
